# Supplementary material for: A FoxA2+ long-term stem cell population is necessary for growth plate cartilage regeneration after injury
Source: PubMed Central journal article supplement (PMC9076650; doi:10.1038/s41467-022-30247-1), 2022-05-06
Supplement: 41467_2022_30247_MOESM1_ESM.pdf [file 41467_2022_30247_MOESM1_ESM.pdf]

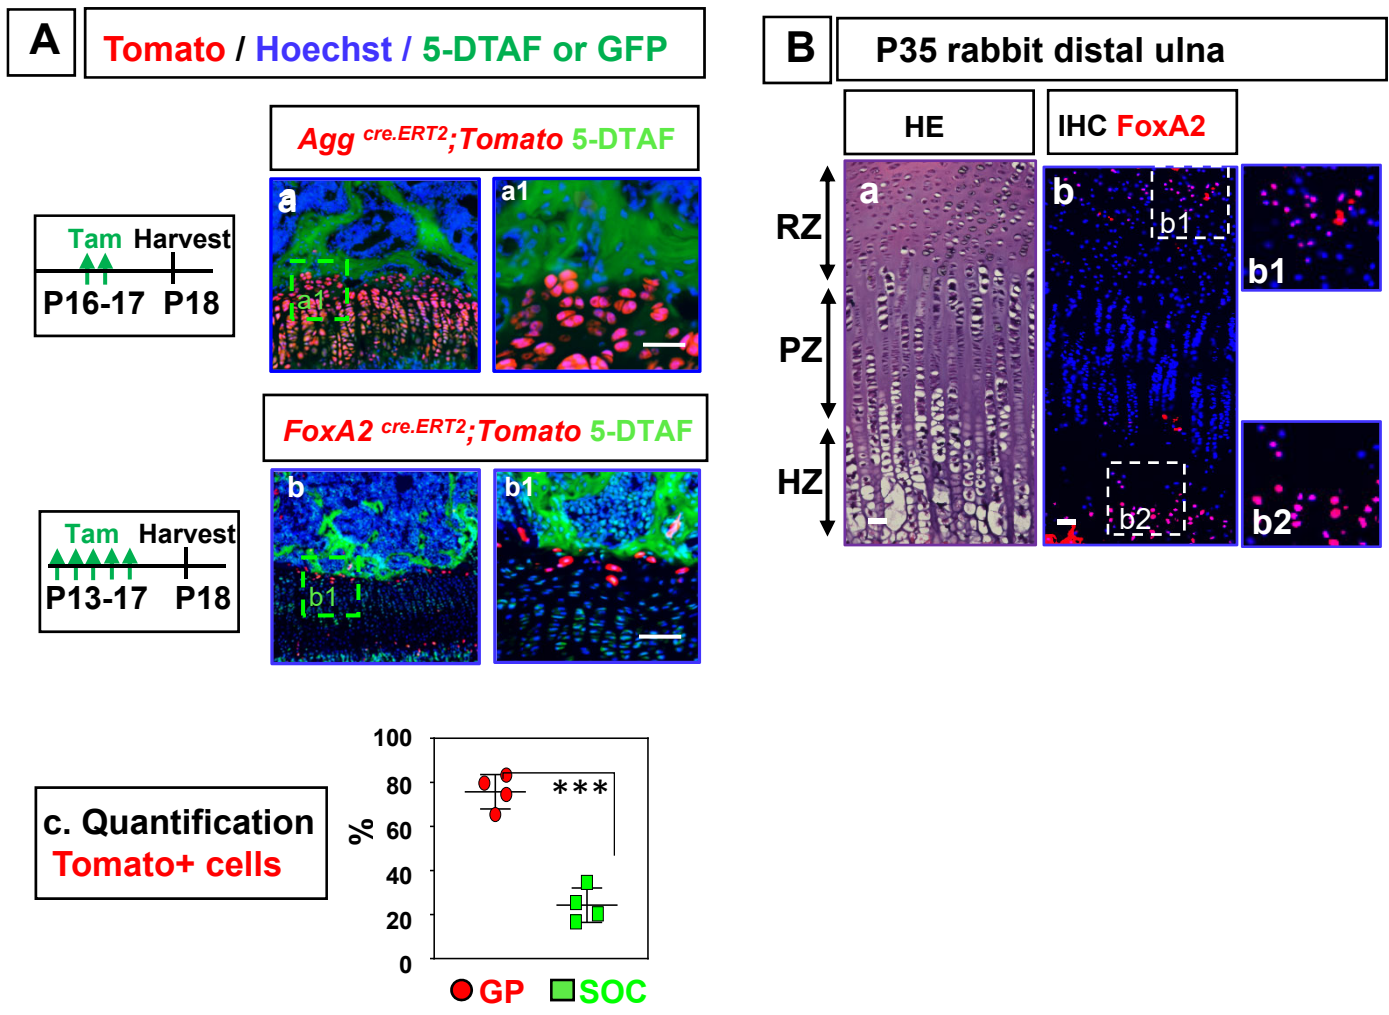

**Supplementary Fig. 1 (A) FoxA2+cells are located at the top of the RZ in both mice and rabbits.**  
**(A)** Tibia sections from *Aggrecan<sup>CreERT2/+</sup>; Tomato<sup>fl/+</sup>* mice, treated with tamoxifen (Tam) P16-P17, harvested at P18. Fluorescence microscopy for Tomato (red), Hoechst (blue) and 5-DTAF (green) (a). Tibia sections from *FoxA2<sup>CreERT2/+</sup>; Tomato<sup>fl/+</sup>* mice treated with tamoxifen P13-P17, harvested at P18. Fluorescence microscopy for Tomato (red), Hoechst (blue) and 5-DTAF (green). Scale bars, 50µm (b). Percentage (%) cells in the GP vs. SOC. Percentage (%) cells in the GP is calculated by dividing the number of Tomato+ cells in the GP (outside the green 5-DTAF domain) to the total number of Tomato+ cells (located in both GP and SOC). Percentage (%) cells in the SOC is calculated by dividing the number of Tomato+ cells in the SOC (in the green 5-DTAF domain) to the total number of Tomato+ cells (located in both GP and SOC). Data are presented as mean±SD of n=4 mice. The asterisks indicate significant difference: Two-tailed Student's unpaired-samples t test; \*\*\*p = 0.000082 (GP vs SOC). Complete statistical information is provided in Supplementary Table 1 (c). **(B)** Hematoxylin and eosin (HE) staining (a), and immunohistochemistry (IHC) with anti-FoxA2 antibody (b) on P35 rabbit ulna. FoxA2 (red), and Hoechst dye (blue). RZ=Resting zone, PZ=Proliferating zone, HZ=hypertrophic zone. Scale bars, 50µm.

**A** Isolation of **FoxA2** cells from **FoxA2<sup>Cre.ERT/+</sup> ZsGreen<sup>fl/+</sup> Tg.col10<sup>mcherry</sup>** mice

1) Separation of GP tissue from AC, SOC and MB

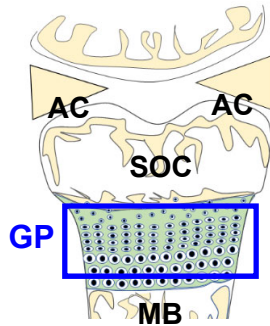

2) Separation of RZ **FoxA2+col.10-** cells from HZ **FoxA2+col.10+** cells using **FoxA2<sup>Cre.ERT/+</sup> ZsGreen<sup>fl/+</sup> Tg.col10<sup>mcherry</sup>** mice

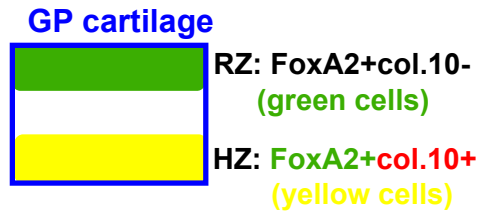

3) Histology **FoxA2<sup>Cre.ERT/+</sup> ZsGreen<sup>fl/+</sup> Tg.col10<sup>mcherry</sup>** mice

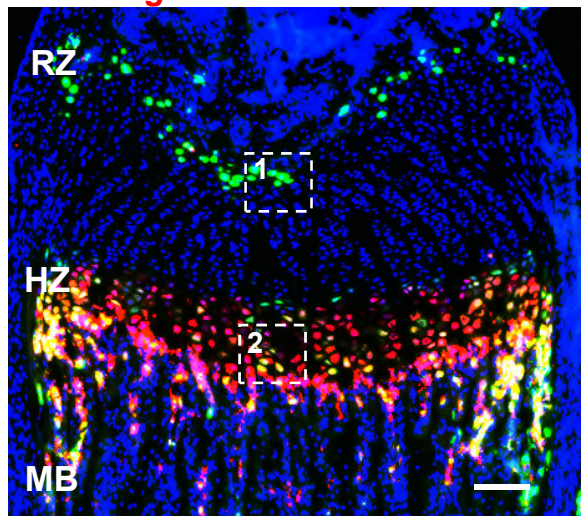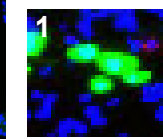

1  
RZ: **FoxA2+col.10-** (green cells)

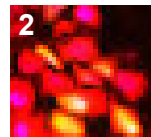

2  
HZ: **FoxA2+col.10+** (yellow cells)

4) FACS **ZsGreen+ & mcherry+** cells

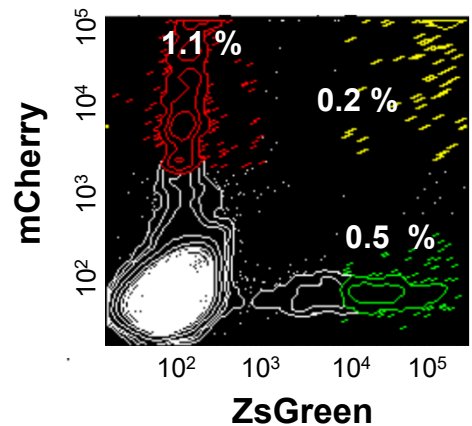

**B** RTPCR for cartilage and bone markers

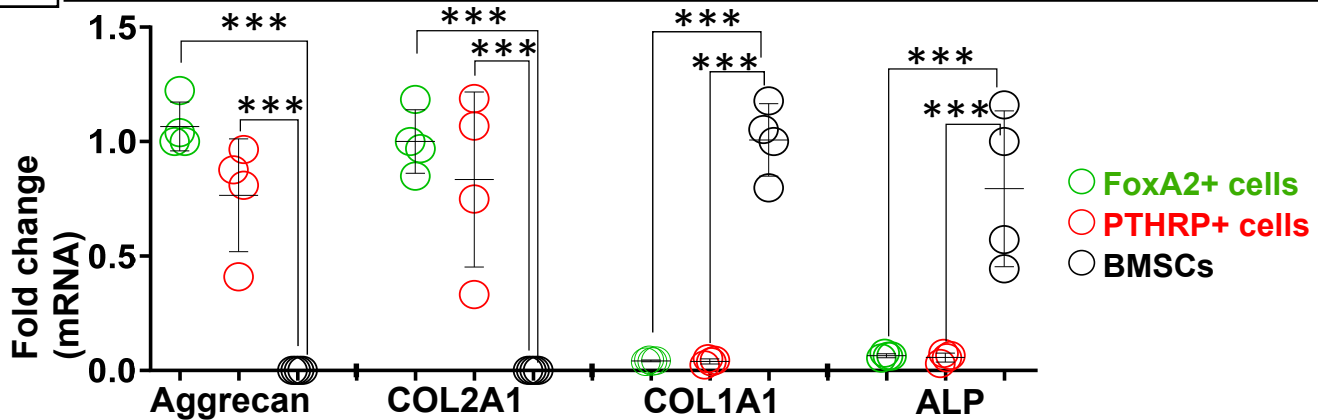

**Supplementary Fig.2** Separation of RZ **FoxA2+** (green) cells from HZ **FoxA2+col.10+** (yellow) cells, isolated from **FoxA2<sup>CreERT2/+</sup>;ZsGreen<sup>fl/+</sup>;col.10<sup>mcherry</sup>** mice. (A) Schematics of GP tissue isolation. AC=articular cartilage, SOC=secondary ossification center, MB=metaphyseal bone, GP=growth plate (1&2). Tibia sections harvested from **FoxA2<sup>CreERT2/+</sup>;ZsGreen<sup>fl/+</sup>;col.10<sup>mcherry</sup>** mice treated with tamoxifen P13-P17, harvested at P18, and counterstained with Hoechst (blue). RZ specific **FoxA2+col.10-** cells (green), HZ specific **FoxA2+col.10+** cells (yellow), HZ specific **col.10+** cells (red). RZ=resting zone, HZ=hypertrophic zone. Scale bars, 100µm. (3). Fluorescence-activated cell sorting (FACS) of GP cells isolated from forelimbs and hindlimbs of **FoxA2<sup>CreERT2/+</sup>;ZsGreen<sup>fl/+</sup>;col.10<sup>mcherry</sup>** mice, injected with tamoxifen from P13 to P17, and harvested at P18. Separation of **FoxA2+** (**ZsGreen+**) cells from **col.10+** (**mcherry+**) cells (4). cont. next page.

**Supplementary Fig.2 Cont.**

(B) Cartilage and bone markers expression in RZ FoxA2+cells, PTHrP+cells and BMSCs (bone marrow mesenchymal cells). RTPCR for *Aggrecan*, *collagen 2*, *collagen 1*, and *alkaline phosphatase (ALP)*. The mRNA fold-change is presented as mean±SD of n=4 samples. The asterisks indicate significant difference: One-way ANOVA, Tukey test; \*\*\*p = 2.61879E-08 (Aggrecan: FoxA2+ cells vs BMSCs), 3.09872E-05 (Aggrecan: PTHRP+ cells vs BMSCs), 1.1691E-07 (COL2A1: FoxA2+ cells vs BMSCs), 5.89962E-06 (COL2A1: PTHRP+ cells vs BMSCs), 2.65003E-07 (COL1A1: FoxA2+ cells vs BMSCs), 2.51267E-07 (COL1A1: PTHRP+ cells vs BMSCs), 7.20261E-05 (ALP: FoxA2+ cells vs BMSCs), 6.00535E-05 (ALP: PTHRP+ cells vs BMSCs). Complete statistical information is provided in Supplementary Table 1.

Cfu assay for **FoxA2+** cells vs **FoxA2+col.10+** cells

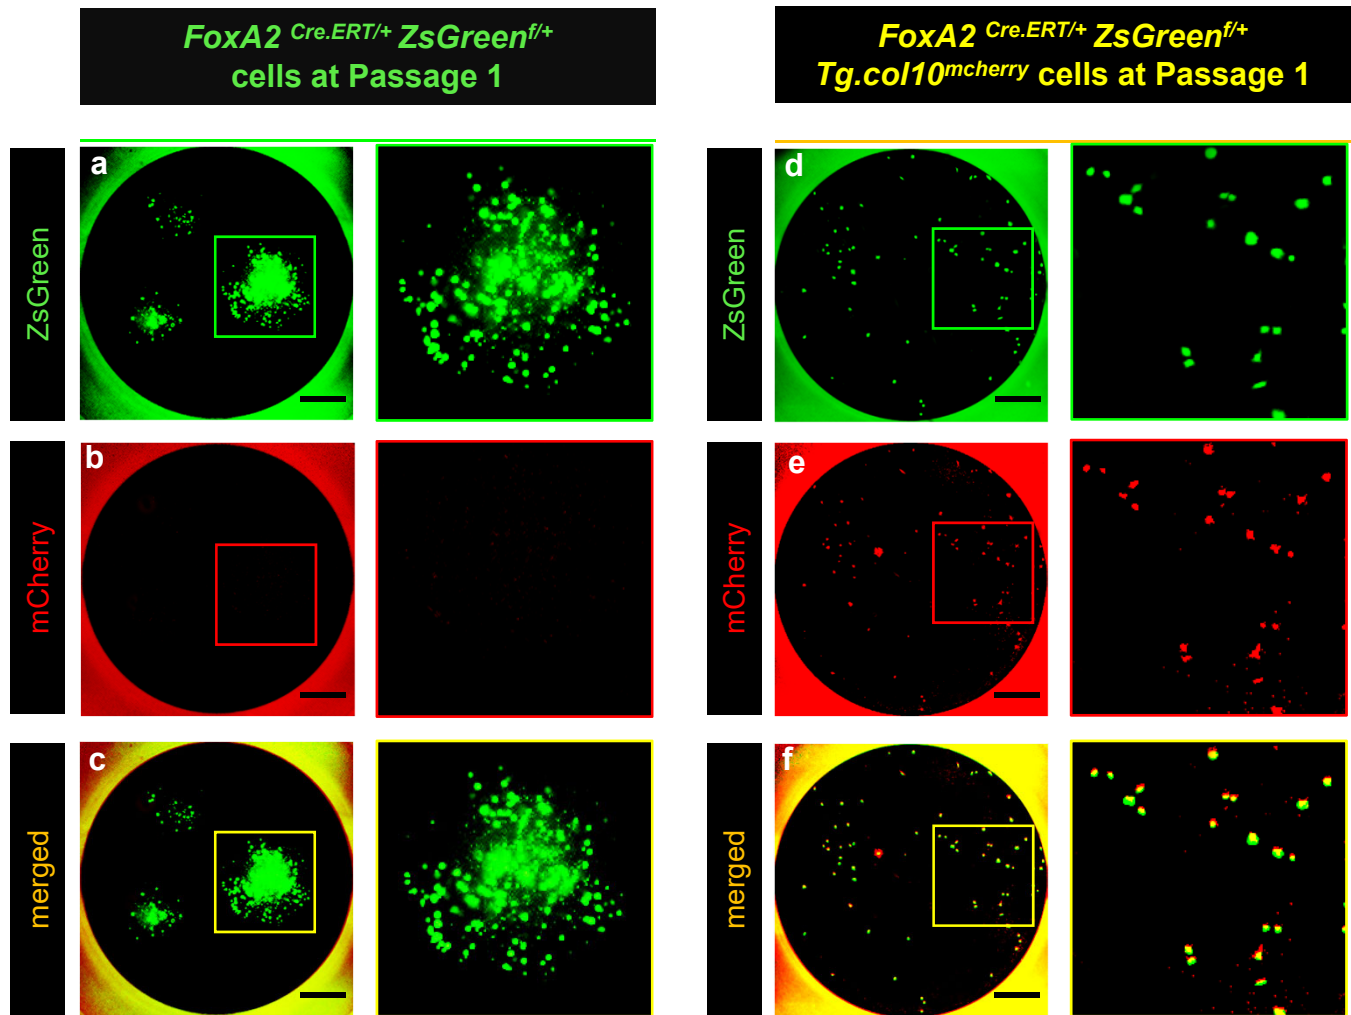

**Supplementary Fig.3** RZ FoxA2<sup>+</sup> (green) cells form distinct primary colonies, whereas HZ FoxA2<sup>+</sup>col.10<sup>+</sup> (yellow) cells fail to form colonies. Colony forming unit (cfu) assay from RZ FoxA2<sup>+</sup> (ZsGreen<sup>+</sup>) cells (a-c) and HZ FoxA2<sup>+</sup>col.10<sup>+</sup> (yellow) cells (d-f), isolated from *FoxA2<sup>Cre.ERT2/+</sup>; ZsGreen<sup>fl/+</sup>; col.10<sup>mcherry</sup>* mice treated with tamoxifen P13-P17 and harvested at P18. Fluorescence microscopy for ZsGreen (green), mcherry (red), merged (yellow). Insets, magnified view of a single colony, or individual cells. Scale bars, 1mm.

## A. Colony size/shape

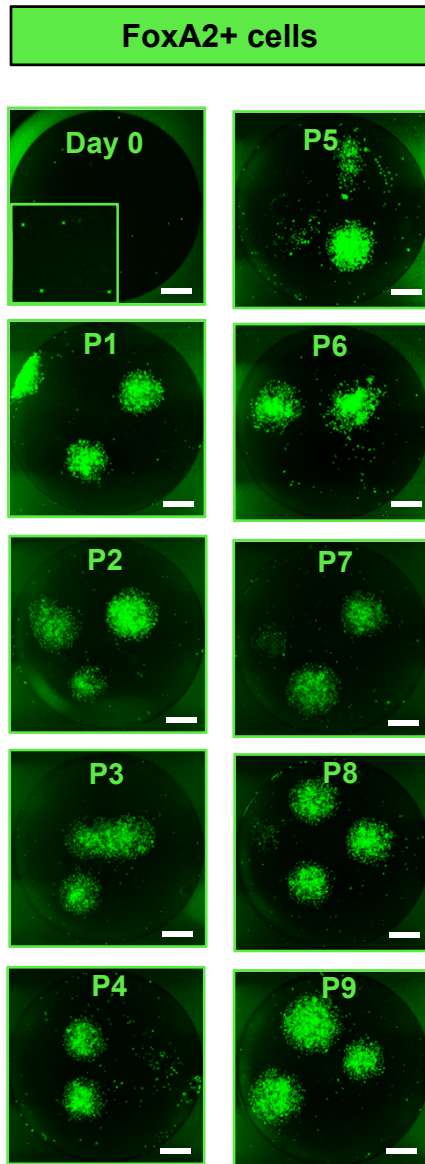

## B. Number of colonies per passage

| Passage # | FoxA2+ cells |    |    | PTHrP+ cells |    |    |
|-----------|--------------|----|----|--------------|----|----|
|           |              |    |    |              |    |    |
| P1        | 50           | 29 | 33 | 50           | 46 | 57 |
| P2        | 16           | 11 | 14 | 6            | 7  | 5  |
| P3        | 9            | 4  | 11 | 2            | 3  | 1  |
| P4        | 3            | 3  | 9  | 1            | 1  | 1  |
| P5        | 2            | 2  | 8  | 1            | 1  |    |
| P6        | 2            | 2  | 8  |              |    |    |
| P7        | 1            | 2  | 7  |              |    |    |
| P8        | 1            | 2  | 7  |              |    |    |
| P9        | 1            | 2  | 7  |              |    |    |

**Supplementary Fig.4 FoxA2+ stem cells display more robust self-renewability than PTHrP+ stem cells.** (A) Colony forming unit (cfu) assay and subsequent passaging (P1-P9) of individual FoxA2+ (green) colonies. RZ FoxA2+ (green) cells were isolated from *FoxA2<sup>CreERT2/+</sup>; ZsGreen<sup>fl/+</sup>; col.10<sup>mcherry</sup>* mice treated with tamoxifen P13-P17, and harvested at P18. Cells were seeded at clonal density in a 96 well plate. Scale bars, 1mm. (B) Comparison between the number of colonies established from FoxA2+cells versus PTHrP+cells. FoxA2+cells were isolated from *FoxA2<sup>CreERT2/+</sup>; ZsGreen<sup>fl/+</sup>; col.10<sup>mcherry</sup>* mice, injected with tamoxifen P13 to P17, and harvested at P18. PTHrP+cells were isolated from P18 PTHrP<sup>mcherry</sup> mice. Data at P1 (passage 1) reflects the number of colonies established from 10<sup>3</sup> cells per 10 cm petri dish. Data from passage P1 to P9 reflects the number of colonies that can be serially propagated, n=3 independent experiments for each cell type.

## A Quantification of tamoxifen labelling efficiency

IHC *FoxA2* at P14

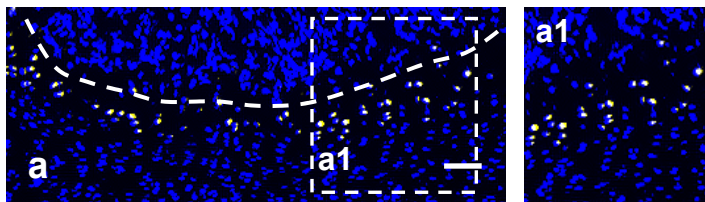

*FoxA2*<sup>cre.ERT2</sup>; *Tomato*<sup>fl/+</sup> mice, 2x tam

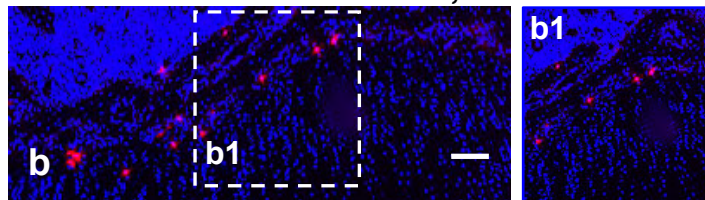

*FoxA2*<sup>cre.ERT2</sup>; *Tomato*<sup>fl/+</sup> mice, 5x tam

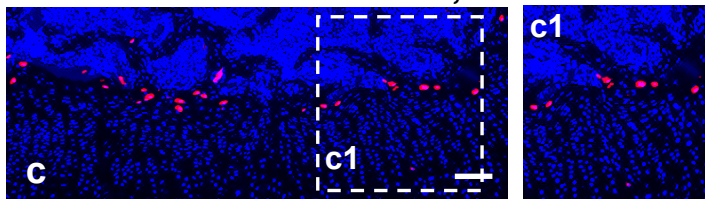

*FoxA2*<sup>cre.ERT2</sup>; *Tomato*<sup>fl/fl</sup> mice, 5x tam

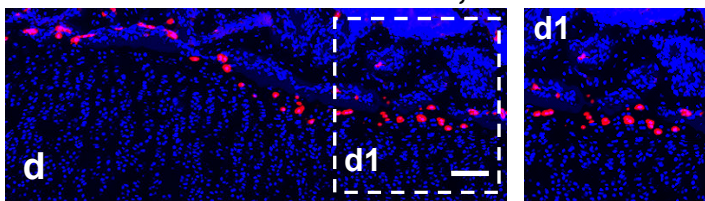

e. Quantification number of **Tomato+** cells

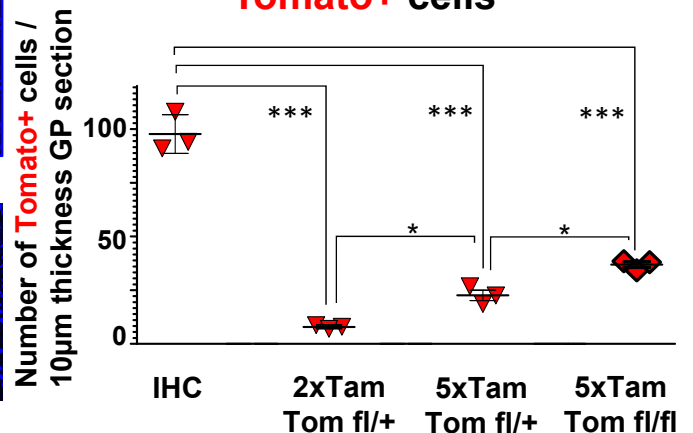

## B Lineage tracing *FoxA2*<sup>Cre.ERT/+</sup> *Tomato*<sup>fl/+</sup> v. *FoxA2*<sup>Cre.ERT/+</sup> *Tomato*<sup>fl/fl</sup> mice, Tam P14-P18

Harvest: 9 months

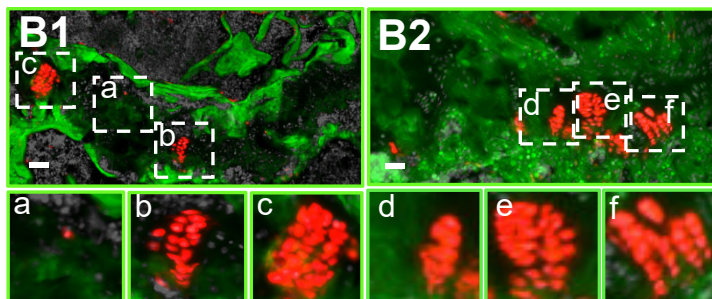

B3

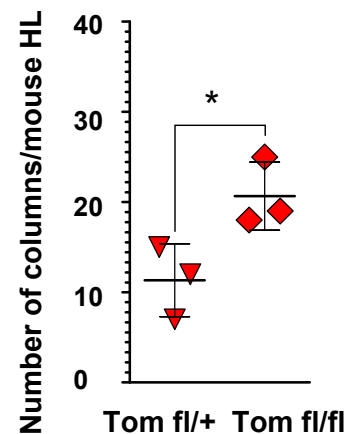

**Supplementary Fig.5 Quantification tamoxifen labeling efficiency.** (A) Tyramide amplification immunohistochemistry (IHC) for *FoxA2* in P14 mice tibia sections (a). Tomato fluorescence microscopy in tibia sections from *FoxA2*<sup>Cre.ERT2/+</sup>; *Tomato*<sup>fl/+</sup> mice with 2x tamoxifen injections (P14-P15, harvest at P19) (b) *FoxA2*<sup>Cre.ERT2/+</sup>; *Tomato*<sup>fl/+</sup> mice with 5x tamoxifen injections (P14-P18, harvest at P19) (c), *FoxA2*<sup>Cre.ERT2/+</sup>; *Tomato*<sup>fl/fl</sup> mice with 5x tamoxifen injections (P14-P18, harvest at P19) (d). Scale bars, 50μm. Quantification of GP *FoxA2*<sup>+</sup> cells detected via IHC or by Tomato<sup>+</sup> fluorescence per 10μm thickness GP section (e). Data are presented as mean±SD, n=3 mice. The asterisks indicate significant difference: One-way ANOVA, Tukey test; \*\*\*p = 8.6701E-08 (IHC vs 2xTam Tom fl/+), 4.43086E-07 (IHC vs 5xTam Tom fl/+), 2.43138E-06 (IHC vs 5xTam Tom fl/fl), \*p = 0.033095466 (2xTam Tom fl/+ vs 5xTam Tom fl/+), 0.03696719 (5xTam Tom fl/+ vs 5xTam Tom fl/fl). Cont. next page

**Supplementary Fig.5 Quantification tamoxifen labeling efficiency. Cont. (B)** Tibia sections harvested from *FoxA2<sup>CreERT2/+</sup>; Tomato<sup>fl/+</sup>* mice (B1) versus *FoxA2<sup>CreERT2/+</sup>; Tomato<sup>fl/fl</sup>* mice (B2) treated with 5x tamoxifen injections (P14-P18), and harvested 9 months after the last injection. Tomato fluorescence (red), 5-DTAF (green), Hoechst dye (grey). Scale bars, 200µm. Representative details, from the section pictured above, shown in numbered insets (a-f). Quantification total number of Tomato+ columns of progeny, per mouse hindlimb (B3). Data are presented as mean±SD, n=3 mice. The asterisks indicate significant difference: Two-tailed Student's unpaired-samples t test; \*p = 0.043278 (Tom fl/+ vs Tom fl/fl). Complete statistical information is provided in Supplementary Table 1.

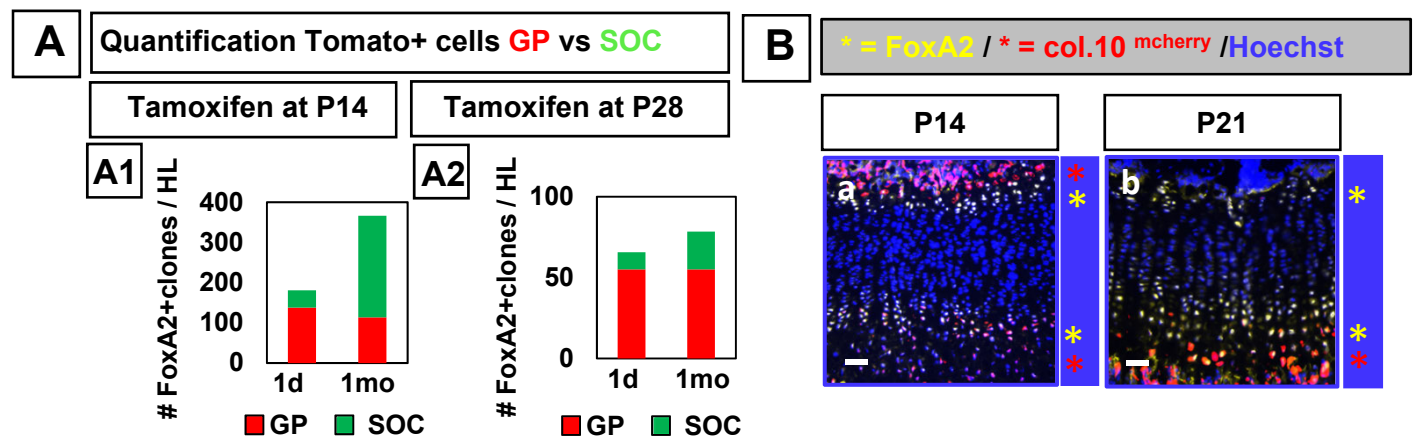

**C** Quantification total number of Tomato+ single cells, clusters, columns

| FOXA2 <sup>Cre</sup> /+ TOM/+ MICE TREATED WITH 5X TAMOXIFEN INJECTIONS STARTING AT P14, AND HARVESTED AT 1-DAY, 1-MO., 3-MO., AND 9-MO. |              |         |        |              |              |         |        |              |              |         |        |              |              |         |        |              |
|------------------------------------------------------------------------------------------------------------------------------------------|--------------|---------|--------|--------------|--------------|---------|--------|--------------|--------------|---------|--------|--------------|--------------|---------|--------|--------------|
|                                                                                                                                          | 1 day        |         |        |              | 1 mo.        |         |        |              | 3 mo.        |         |        |              | 9 mo.        |         |        |              |
|                                                                                                                                          | SINGLE CELLS | CLUSTER | COLUMN | TOTAL CLONES | SINGLE CELLS | CLUSTER | COLUMN | TOTAL CLONES | SINGLE CELLS | CLUSTER | COLUMN | TOTAL CLONES | SINGLE CELLS | CLUSTER | COLUMN | TOTAL CLONES |
| MOUSE 1                                                                                                                                  | 106          | 35      | 0      | 141          | 101          | 72      | 1      | 174          | 31           | 16      | 4      | 51           | 13           | 9       | 15     | 37           |
| MOUSE 2                                                                                                                                  | 103          | 14      | 0      | 117          | 48           | 42      | 1      | 91           | 24           | 13      | 1      | 38           | 32           | 16      | 12     | 60           |
| MOUSE 3                                                                                                                                  | 128          | 27      | 0      | 155          | 41           | 33      | 1      | 75           | 18           | 13      | 4      | 35           | 10           | 14      | 7      | 31           |
| Total Clones From All 3 Mice =                                                                                                           | 413          |         |        |              | 340          |         |        |              | 124          |         |        |              | 128          |         |        |              |

  

| FOXA2 <sup>Cre</sup> /+ TOM/+ MICE TREATED WITH 10X TAMOXIFEN INJECTIONS STARTING AT P28, AND HARVESTED AT 1-DAY, 1-MO., 3-MO., AND 9-MO. |              |         |        |              |              |         |        |              |              |         |        |              |              |         |        |              |
|-------------------------------------------------------------------------------------------------------------------------------------------|--------------|---------|--------|--------------|--------------|---------|--------|--------------|--------------|---------|--------|--------------|--------------|---------|--------|--------------|
|                                                                                                                                           | 1 day        |         |        |              | 1 mo.        |         |        |              | 3 mo.        |         |        |              | 9 mo.        |         |        |              |
|                                                                                                                                           | SINGLE CELLS | CLUSTER | COLUMN | TOTAL CLONES | SINGLE CELLS | CLUSTER | COLUMN | TOTAL CLONES | SINGLE CELLS | CLUSTER | COLUMN | TOTAL CLONES | SINGLE CELLS | CLUSTER | COLUMN | TOTAL CLONES |
| MOUSE 1                                                                                                                                   | 53           | 10      | 0      | 63           | 36           | 26      | 5      | 67           | 22           | 14      | 10     | 46           | 30           | 7       | 29     | 66           |
| MOUSE 2                                                                                                                                   | 47           | 13      | 0      | 60           | 30           | 37      | 0      | 67           | 25           | 24      | 6      | 55           | 17           | 10      | 32     | 59           |
| MOUSE 3                                                                                                                                   | 30           | 12      | 0      | 42           | 18           | 33      | 1      | 52           | 36           | 27      | 8      | 71           | 20           | 15      | 18     | 53           |
| Total Clones From All 3 Mice =                                                                                                            | 165          |         |        |              | 186          |         |        |              | 172          |         |        |              | 178          |         |        |              |

**Supplementary Fig.6 The dynamics of FoxA2+cells clonality. (A)** Total number of Tomato+ cells quantified in growth plate (GP) and secondary ossification center (SOC), for FoxA2<sup>CreERT2/+</sup>; Tomato<sup>fl/+</sup> mice treated with tamoxifen P14-P18, and harvested at 1-day and 1-month (A1), or treated with tamoxifen P28-P37, and harvested at 1-day and 1-month (A2). To quantify the number of FoxA2+ (Tomato+) cells present in the GP, we counted the Tomato+ cells in a domain extending 100µm away from the GP/SOC interface, towards the GP. To quantify the number of FoxA2+ (Tomato+) cells present in the SOC, we counted the Tomato+ cells in a domain extending 100µm away from the GP/SOC interface, towards the SOC. The number of Tomato+cells represents a sum of n= 8 sections per mouse hindlimb. **(B)** Immunohistochemistry for FoxA2, and fluorescence microscopy of Tg.col10<sup>mcherry</sup> mice on P14 (a) and P21 (b) tibia sections. FoxA2 (yellow), mcherry fluorescence (red), Hoechst (blue). Scale bars, 50µm. **(C)** Quantification total number of Tomato+ clones (single cells, clusters, columns) from FoxA2<sup>CreERT2/+</sup>;Tomato<sup>fl/+</sup> mice injected with tamoxifen starting P14, or P28, and harvested 1-day, 1-, 3-, or 9- months after the last injection.



**A** Serial transplantation of **FoxA2+** cells *in vivo*

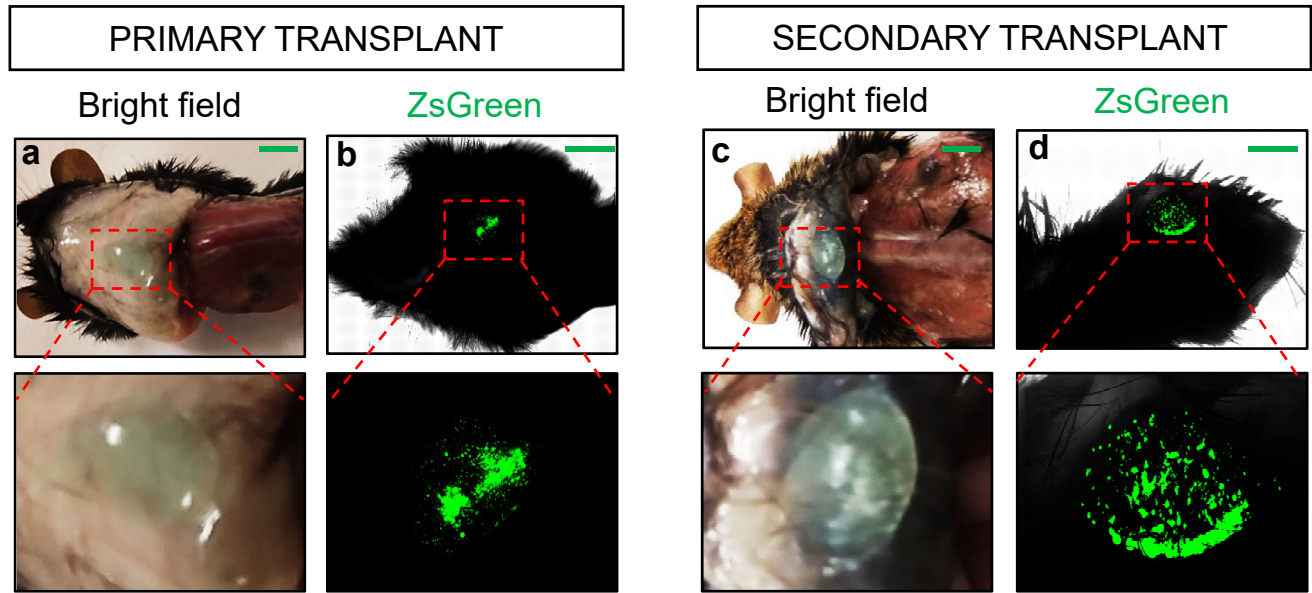

**B** Isolation and assessment of differentiation potential of **FoxA2+ (ZsGreen+)** cells

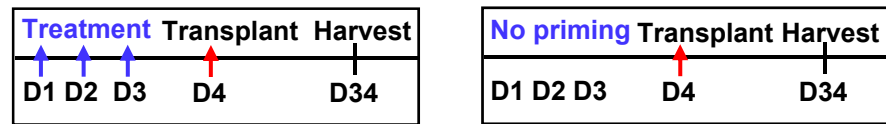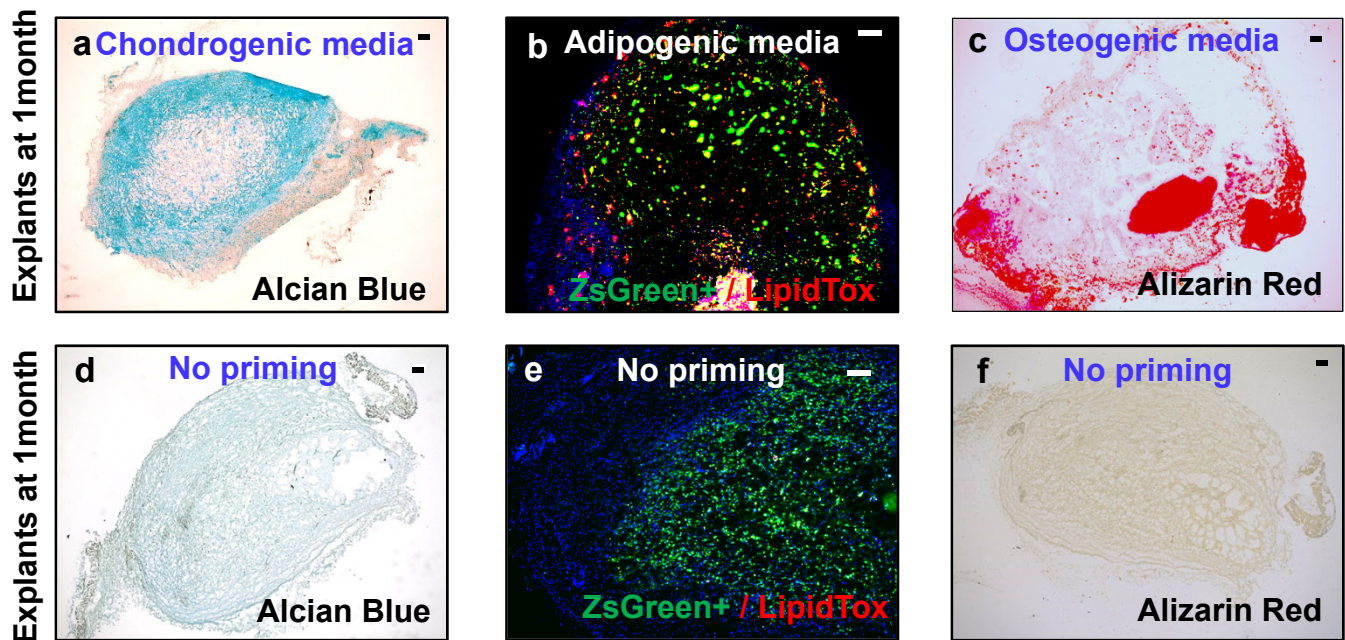

**Supplementary Fig.7** Isolation and assessment of differentiation potential of **FoxA2+** (**ZsGreen+**) cells in the serial reconstitution assay. **(A)** Bright-field and fluorescence images showing the primary (a, b) and secondary (c, d) grafts 1-month after transplantation in secondary and tertiary recipient mice. Scale bars, 1 cm. **(B)** Alcian blue (a), LipidTox (b) or Alizarin Red-S (c) staining of cross-sections of grafts generated 30 days after transplantation of lineage-primed **FoxA2+** cells under chondrogenic, adipogenic or osteogenic conditions. Alcian blue (d), LipidTox (e) or Alizarin Red-S (f) staining of cross-sections of grafts generated 30 days after transplantation of **FoxA2+** cells, in the absence of lineage priming. Scale bar, 200  $\mu$ m.

## A SH1 – like GP injury measurements

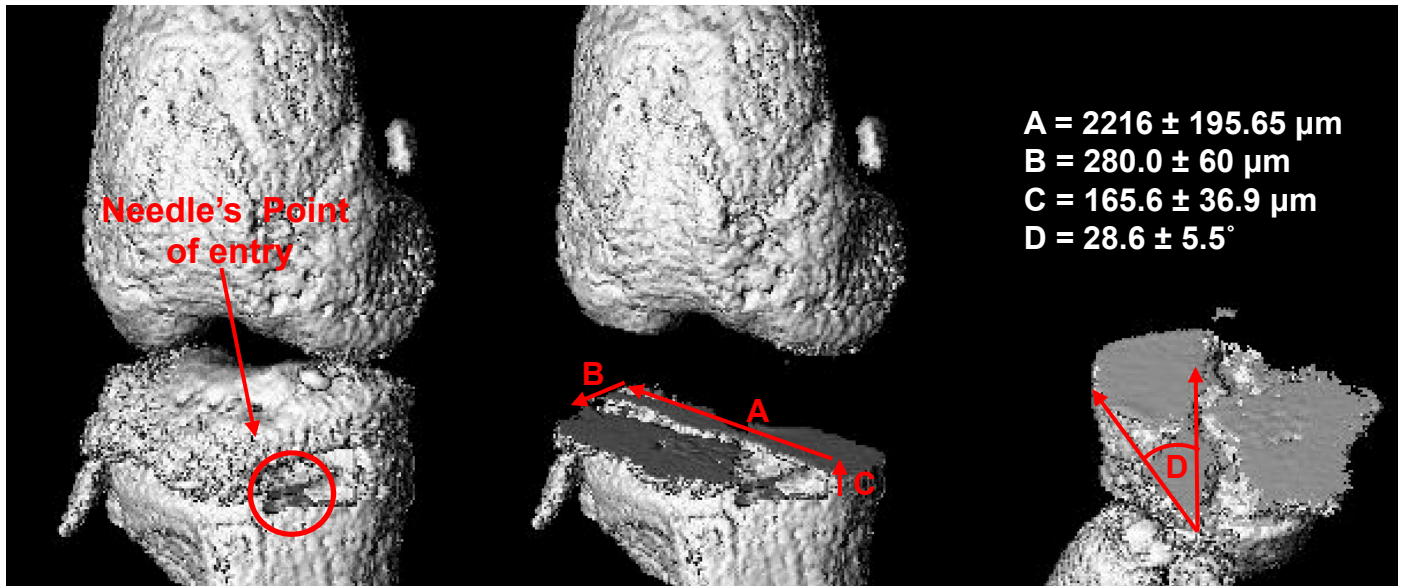

## B Dimensions of the GP lesion

| Mouse ID | A (μm) | B (μm) | C (μm) | D (Degree) |
|----------|--------|--------|--------|------------|
| Mouse 1  | 2120   | 230    | 198    | 22.33      |
| Mouse 2  | 2020   | 220    | 162    | 28.15      |
| Mouse 3  | 2200   | 370    | 162    | 31.39      |
| Mouse 4  | 2540   | 290    | 108    | 24.81      |
| Mouse 5  | 2200   | 290    | 198    | 36.2       |

## C Tibia growth after SH1 – like GP injury

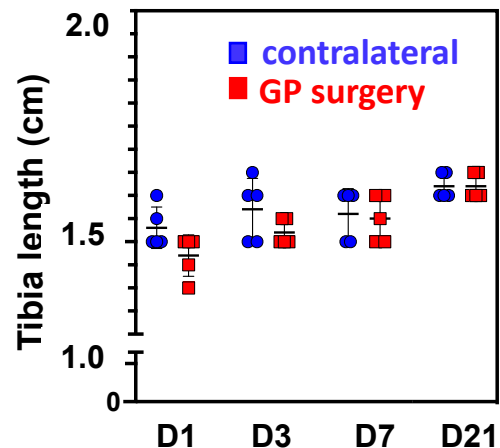

**Supplementary Fig.8 Dimensions of the GP lesion after SH1–like surgery.** (A) A 3D reconstruction of the injured growth plate (GP) proximal tibia, 1-day after surgery, exposure to CA4+. Visualization of the defect, induced by the SH1 (Salter Harris type 1)-like surgery, in the tibial physis. Average dimensions, and angle relative to the coronal plane, from n=5 independent surgeries. CECT measurements of the SH1-like injury: A (lateral to medial), B (anterior to posterior), C (height), D (angle). (B) Dimensions of the GP lesion, n=5 surgeries. (C) Quantification of the total tibial length at 1-day, 3-days, 7-days, and 21-days after SH1-like surgery in both the operated leg and the contralateral leg. Data are presented as mean±SD, n=5 mice. Complete statistical information is provided in Supplementary Table 1.

SH1-like surgery on *FoxA2<sup>Cre.ERT/+</sup>Tomato<sup>fl/fl</sup>* mice

Tam Surgery Harvest  
P13-16 P18 D1-D3-D7

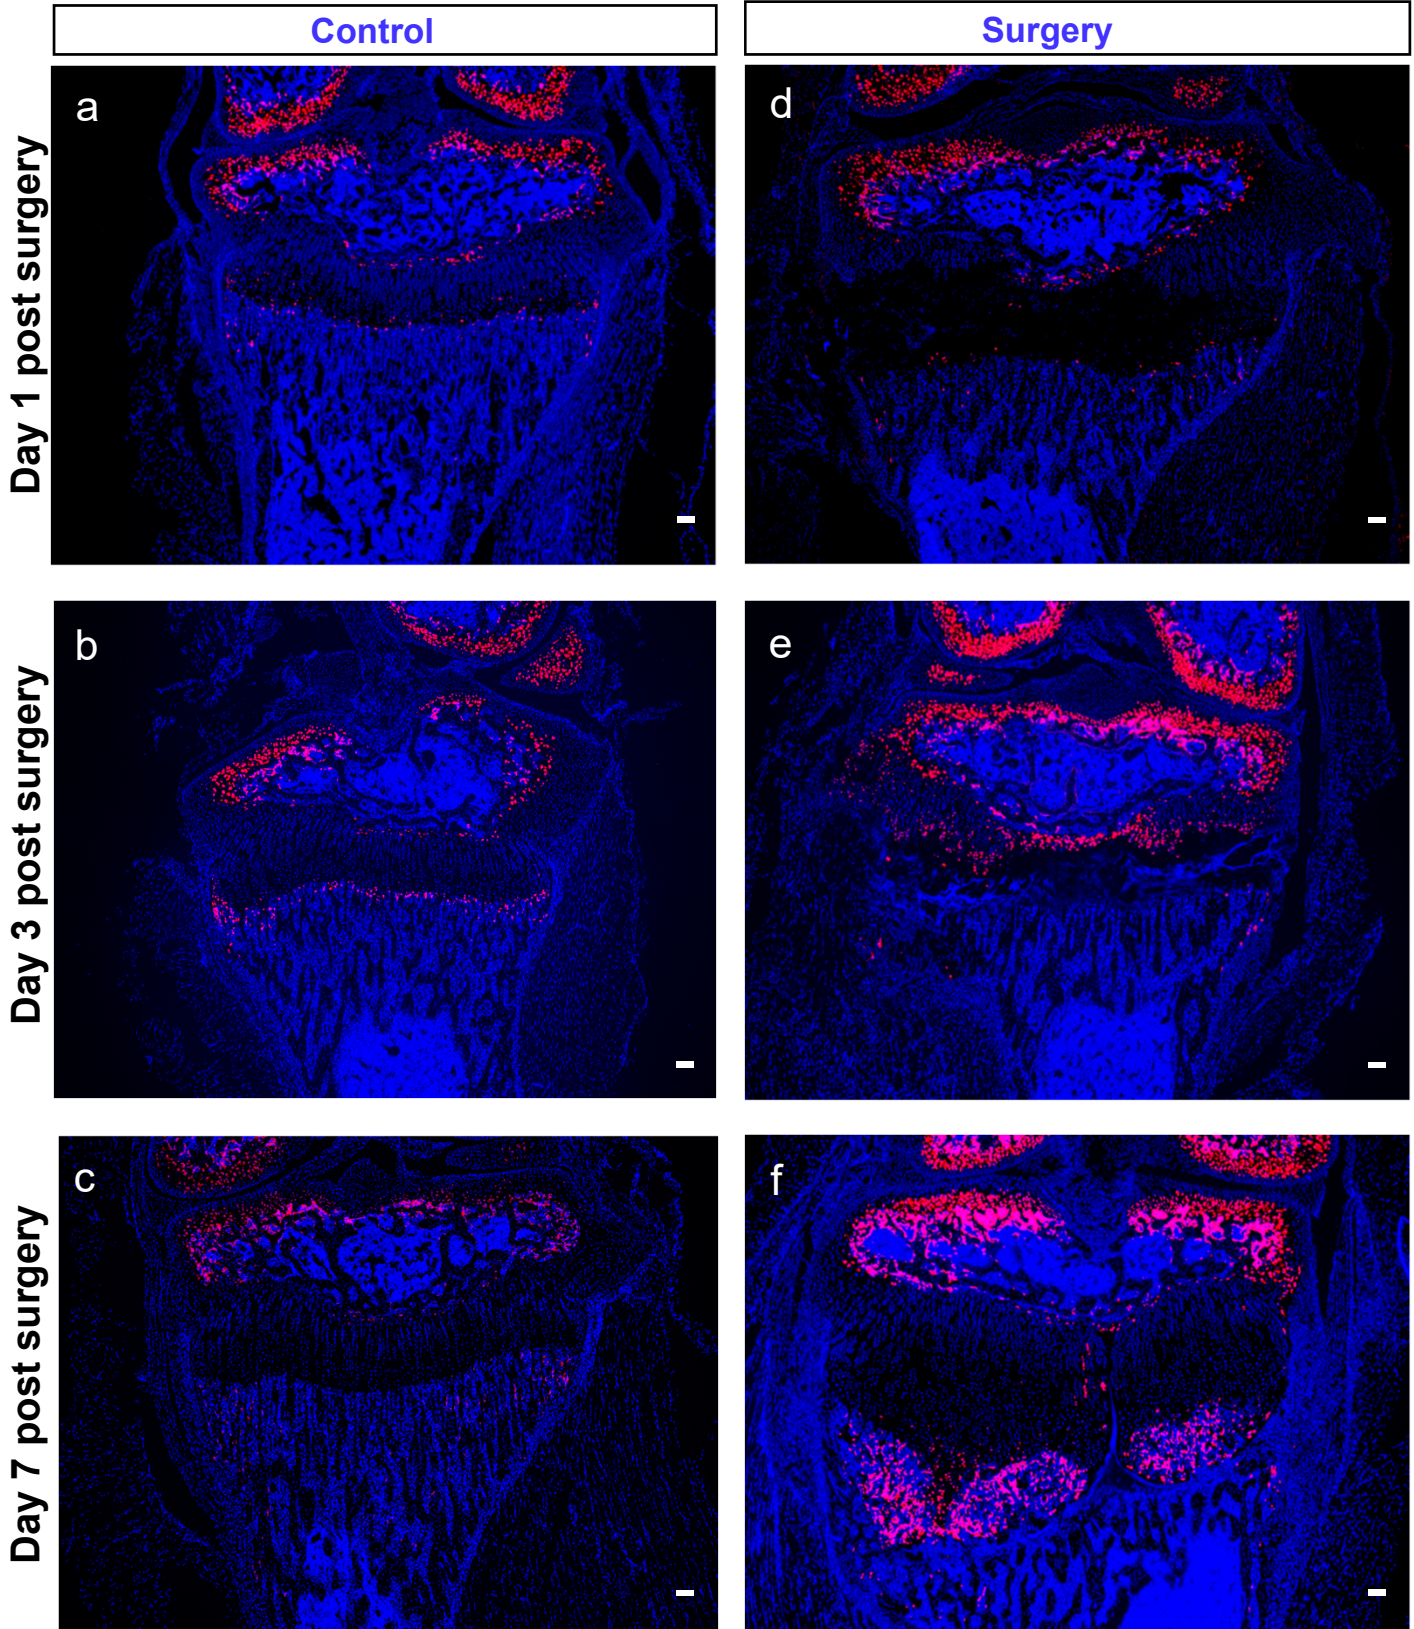

**Supplementary Fig.9** FoxA2+ cells expand in response to SH1-like surgery. Control (a-c) and operated (d-f) tibia from *FoxA2<sup>Cre.ERT2/+</sup>;Tomato<sup>fl/fl</sup>* mice, injected with tamoxifen (Tam) P13-P16, operated via SH1 (Salter Harris type 1)-like surgery at P18, and harvested at 1-, 3-, 7-days post-op. Tomato fluorescence (red), Hoechst (blue), 4x magnification, whole tibia sections. Scale bars, 100 $\mu$ m.

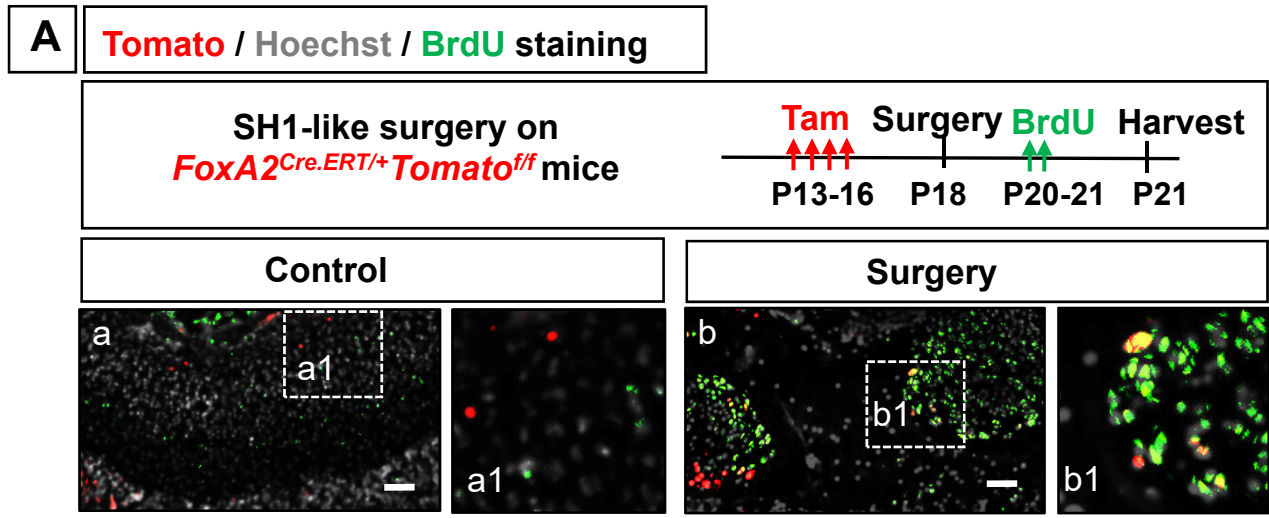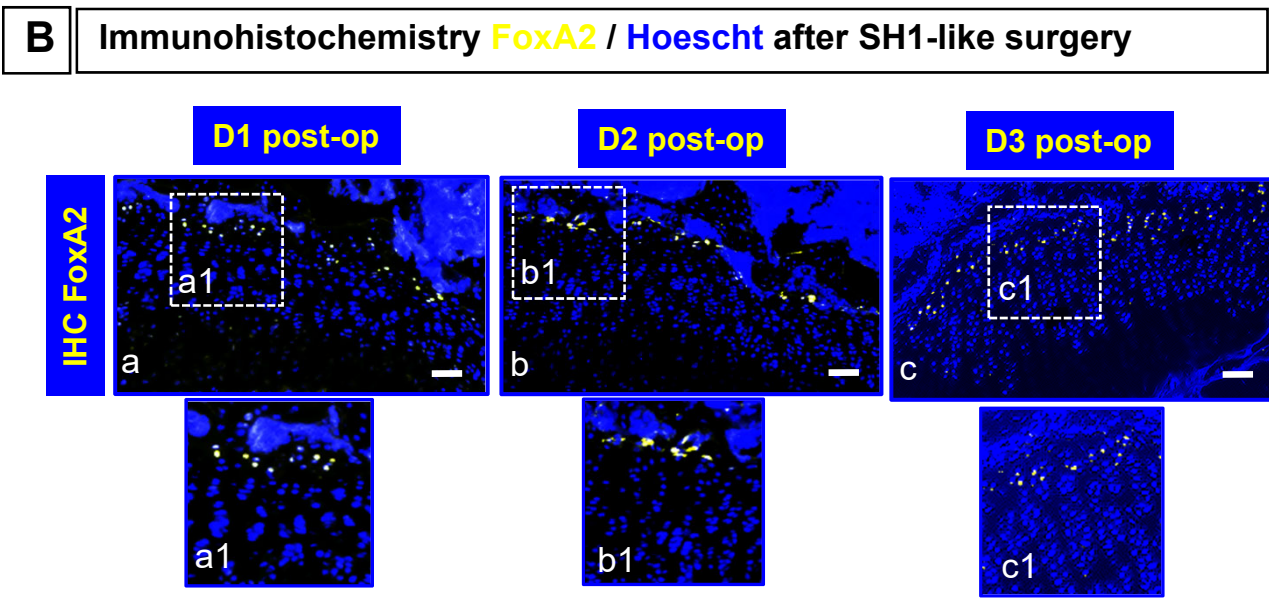

**Supplementary Fig.10 FoxA2+ cells are BrdU positive. (A)** Control (a) and operated (b) tibia from *FoxA2<sup>CreERT2/+</sup>Tomato<sup>fl/fl</sup>* mice, injected with tamoxifen (Tam) P13-P16, operated at P18 via SH1 (Salter Harris type 1)-like surgery, treated with 3x BrdU injections administrated P20-P21, harvested at P21 (3-days post-op). Tomato fluorescence (red), Hoechst (blue), BrdU (green). Insets, magnified view of injury (b1) or control (a1). Scale bars, 100µm. **(B)** Immunohistochemistry (IHC) for FoxA2, on operated tibias harvested at 1-day (a), 2-days (b), 3-days (c) after SH1-like surgery. FoxA2 (yellow), Hoechst (blue). Insets, magnified view of injury (a1-c1). Scale bars, 100µm.

## Gating Strategy

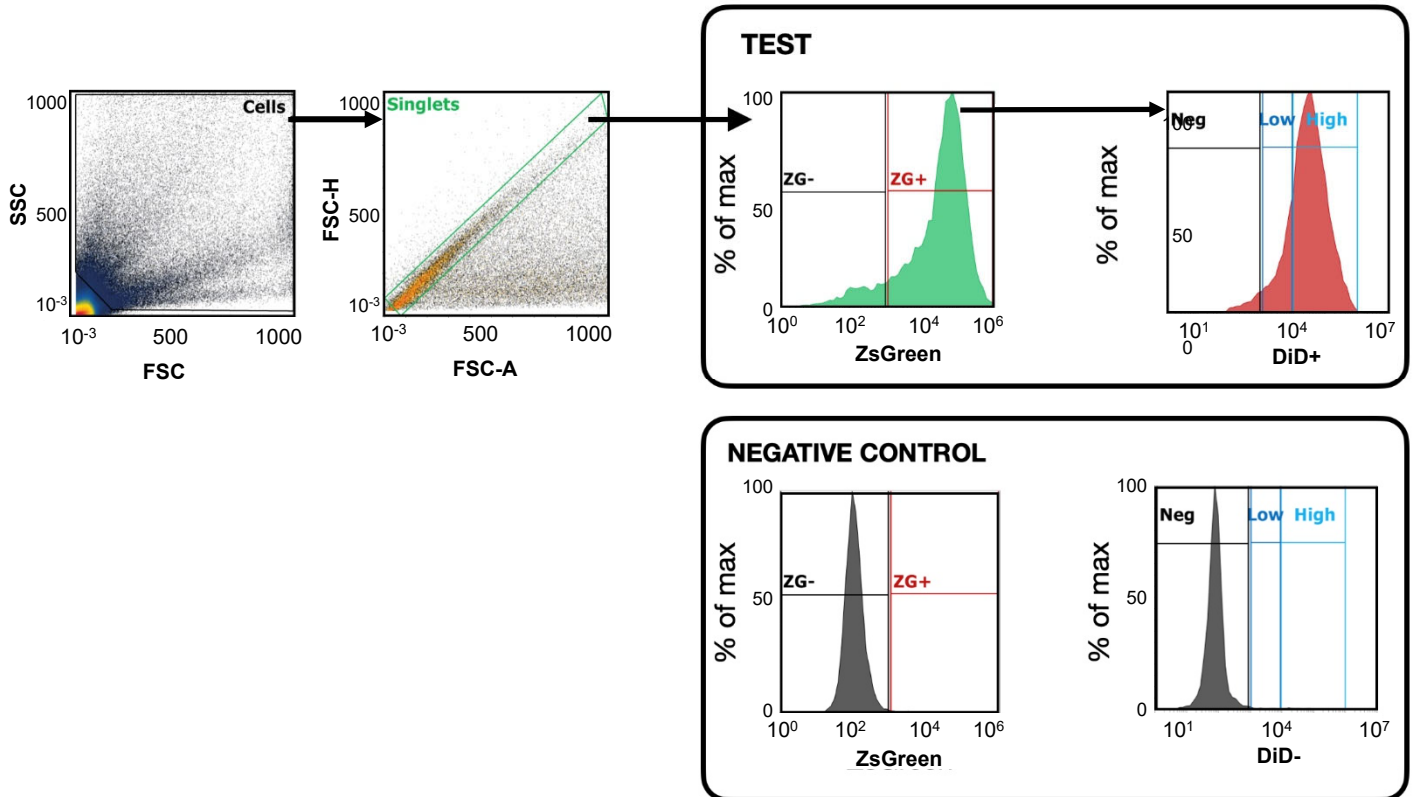

**Supplementary Fig.11** Gating strategy used for proliferation tracking to test self-renewal property of transplanted FoxA2+ (ZsGreen+) cells in the serial *in vivo* reconstitution assay. Representative FACS plots showing gating scheme for defining DiD<sup>high</sup> and DiD<sup>low</sup> subpopulations within the ZsGreen+ population of cells isolated from the primary and secondary FoxA2+ cell grafts. After exclusion of doublets, ZsGreen+ cells were gated and the proportion of DiD<sup>high</sup> and DiD<sup>low</sup> cells was evaluated.

# Supplementary Table S1

| Figure                                 | Dataset                      | Statistical test           | Multiple comparison test | n | Exact P value |
|----------------------------------------|------------------------------|----------------------------|--------------------------|---|---------------|
| <b>Fig. 2A</b>                         | P3-4 GP vs P3-4 SOC          | One-way ANOVA              | Tukey                    | 3 | 0.000003      |
|                                        | P7-8 GP vs P7-8 SOC          | One-way ANOVA              | Tukey                    | 3 | 0.000005      |
|                                        | P13-14 GP vs P13-14 SOC      | One-way ANOVA              | Tukey                    | 3 | 0.980399      |
|                                        | P13-17 GP vs P13-17 SOC      | One-way ANOVA              | Tukey                    | 3 | 0.011031      |
|                                        | P3-4 GP vs P13-17 GP         | One-way ANOVA              | Tukey                    | 3 | 0.000569      |
|                                        | P7-8 GP vs P13-17 GP         | One-way ANOVA              | Tukey                    | 3 | 0.000828      |
| <b>Fig. 5B (d)</b>                     | D0 vs D30                    | unpaired two-tailed t test | —                        | 3 | 7.0148E-07    |
| <b>Fig. 5B (e)</b>                     | D0 vs D30                    | unpaired two-tailed t test | —                        | 3 | 7.84512E-06   |
| <b>Fig. 5B (g)</b>                     | D0 vs D30                    | unpaired two-tailed t test | —                        | 3 | 3.32176E-06   |
| <b>Fig. 5B (h)</b>                     | D0 vs D30                    | unpaired two-tailed t test | —                        | 3 | 3.46695E-06   |
| <b>Fig. 6D</b>                         | d1 vs d3                     | unpaired two-tailed t test | —                        | 5 | 0.055556      |
|                                        | d1 vs d7                     | unpaired two-tailed t test | —                        | 5 | 0.0079        |
| <b>Fig. 6F</b>                         | d1 vs d3                     | unpaired two-tailed t test | —                        | 3 | 0.037861      |
|                                        | d3 vs d7                     | unpaired two-tailed t test | —                        | 3 | 0.007121      |
|                                        | d1 vs d7                     | unpaired two-tailed t test | —                        | 3 | 0.000839      |
| <b>Fig. 7B b1. GP</b>                  | Day1: control vs operated    | One-way ANOVA              | Tukey                    | 4 | 0.391815      |
|                                        | Day3: control vs operated    | One-way ANOVA              | Tukey                    | 4 | 0.032625      |
|                                        | Day7: control vs operated    | One-way ANOVA              | Tukey                    | 4 | 0.999984      |
| <b>Fig. 7B b2. SOC</b>                 | Day1: control vs operated    | One-way ANOVA              | Tukey                    | 4 | 0.999069      |
|                                        | Day3: control vs operated    | One-way ANOVA              | Tukey                    | 4 | 0.998693      |
|                                        | Day7: control vs operated    | One-way ANOVA              | Tukey                    | 4 | 0.995554      |
| <b>Fig. 7B b3. Metaphysis</b>          | Day1: control vs operated    | One-way ANOVA              | Tukey                    | 4 | 0.036130      |
|                                        | Day3: control vs operated    | One-way ANOVA              | Tukey                    | 4 | 0.021045      |
|                                        | Day7: control vs operated    | One-way ANOVA              | Tukey                    | 4 | 0.000003      |
| <b>Fig. 8B</b>                         | CreTom vs CreTom DTA         | unpaired two-tailed t test | —                        | 4 | 0.028571      |
| <b>Fig. 8D</b>                         | DTA/DTA vs CreDTA/DTA        | unpaired two-tailed t test | —                        | 5 | 0.007937      |
| <b>Supplementary Fig. 1A</b>           | GP vs SOC                    | unpaired two-tailed t test | —                        | 4 | 0.000082      |
| <b>Supplementary Fig. 2B Aggrecan:</b> |                              |                            |                          |   |               |
|                                        | FoxA2+ cells vs PTHRP+ cells | One-way ANOVA              | Tukey                    | 4 | 0.436345154   |
|                                        | FoxA2+ cells vs BMSCs        | One-way ANOVA              | Tukey                    | 4 | 2.61879E-08   |
|                                        | PTHRP+ cells vs BMSCs        | One-way ANOVA              | Tukey                    | 4 | 3.09872E-05   |
| <b>COL2A1:</b>                         |                              |                            |                          |   |               |
|                                        | FoxA2+ cells vs PTHRP+ cells | One-way ANOVA              | Tukey                    | 4 | 0.970384408   |
|                                        | FoxA2+ cells vs BMSCs        | One-way ANOVA              | Tukey                    | 4 | 1.1691E-07    |
|                                        | PTHRP+ cells vs BMSCs        | One-way ANOVA              | Tukey                    | 4 | 5.89962E-06   |
| <b>COL1A1:</b>                         |                              |                            |                          |   |               |
|                                        | FoxA2+ cells vs PTHRP+ cells | One-way ANOVA              | Tukey                    | 4 | >0.99999999   |
|                                        | FoxA2+ cells vs BMSCs        | One-way ANOVA              | Tukey                    | 4 | 2.65003E-07   |
|                                        | PTHRP+ cells vs BMSCs        | One-way ANOVA              | Tukey                    | 4 | 2.51267E-07   |
| <b>ALP:</b>                            |                              |                            |                          |   |               |
|                                        | FoxA2+ cells vs PTHRP+ cells | One-way ANOVA              | Tukey                    | 4 | >0.99999999   |
|                                        | FoxA2+ cells vs BMSCs        | One-way ANOVA              | Tukey                    | 4 | 7.20261E-05   |
|                                        | PTHRP+ cells vs BMSCs        | One-way ANOVA              | Tukey                    | 4 | 6.00535E-05   |
| <b>Supplementary Fig. 5A</b>           | IHC vs. 2xT                  | One-way ANOVA              | Tukey                    | 3 | 8.6701E-08    |
|                                        | IHC vs. 5xT                  | One-way ANOVA              | Tukey                    | 3 | 4.43086E-07   |
|                                        | IHC vs. 5xTT                 | One-way ANOVA              | Tukey                    | 3 | 2.43138E-06   |
|                                        | 2xT vs. 5xT                  | One-way ANOVA              | Tukey                    | 3 | 0.033095466   |
|                                        | 5xT vs. 5xTT                 | One-way ANOVA              | Tukey                    | 3 | 0.03696719    |
| <b>Supplementary Fig. 5B</b>           | Tom/+ vs Tom/Tom             | unpaired two-tailed t test | —                        | 3 | 0.043278      |
| <b>Supplementary Fig. 8C</b>           | Day1: control vs operated    | One-way ANOVA              | Tukey                    | 5 | 0.433288      |
|                                        | Day3: control vs operated    | One-way ANOVA              | Tukey                    | 5 | 0.653546      |
|                                        | Day7: control vs operated    | One-way ANOVA              | Tukey                    | 5 | 0.999961      |
|                                        | Day21: control vs operated   | One-way ANOVA              | Tukey                    | 5 | >0.999999     |

**Supplementary Table 1** Statistical tests and p-values for quantitative data.
